# Supplementary material
Source: PubMed Central journal article supplement (PMC2849195)
Supplement: supp_76_8_2397__1.pdf [file supp_76_8_2397__1.pdf]

Supplement 1. Sources and characteristics of plasmids and primers used in this study.

| <b>Plasmids</b>                   |                                                                  |            |
|-----------------------------------|------------------------------------------------------------------|------------|
| <b><i>pflB</i> deletion</b>       |                                                                  |            |
| pLOI4667                          | <i>bla kan; pflB</i> from <i>E.coli</i> cloned into pCR2.1-TOPO  | This study |
| pLOI4668                          | <i>cat-sacB</i> cassette cloned into <i>pflB</i> of pLOI4667     | This study |
| pLOI4669                          | <i>PacI</i> digestion of pLOI4668, self-ligated                  | This study |
| <b><i>pck</i> promoter change</b> |                                                                  |            |
| pLOI4736                          | <i>bla kan; pck-P</i> from <i>E.coli</i> cloned into pCR2.1-TOPO | This study |
| pLOI4737                          | <i>cat-sacB</i> cassette cloned into <i>pck-P</i> of pLOI4736    | This study |
| <b><i>ptsI</i> deletion</b>       |                                                                  |            |
| pLOI4734                          | <i>bla kan; ptsI</i> from <i>E.coli</i> cloned into pCR2.1-TOPO  | This study |
| pLOI4735                          | <i>cat-sacB</i> cassette cloned into <i>ptsI</i> of pLOI4734     | This study |
| pLOI4735B                         | <i>PacI</i> digestion of pLOI4735, self-ligated                  | This study |
| <b><i>gldA</i> deletion</b>       |                                                                  |            |
| pLOI4296                          | <i>bla kan; gldA</i> from <i>E.coli</i> cloned into pCR2.1-TOPO  | This study |
| pLOI4297                          | <i>cat-sacB</i> cassette cloned into <i>gldA</i> of pLOI4296     | This study |
| pLOI4298                          | <i>PacI</i> digestion of pLOI4297, self-ligated                  | This study |
| <b>Primers</b>                    |                                                                  |            |
| <b><i>pflB</i> deletion</b>       |                                                                  |            |
| pflB-up2                          | TGTCCGAGCTTAATGAAAAGTT                                           | This study |
| pflB-down2                        | CGAGTAATAACGTCCTGCTGCT                                           |            |
| pflB-5                            | AAACGGGTAACACCCCAGAC                                             |            |
| pflB-6                            | CGGAGTGTAACGTCAACA                                               |            |
| <b><i>pck</i> mutation</b>        |                                                                  |            |
| pck-Pro-up                        | CACGGTAGCAACAACATTGC                                             | This study |
| pck-Pro-down                      | AGAAAGCGTCGACAACGAAC                                             |            |
| pck-Pro-1                         | ATGCGCGTTA ACAATGGTTT                                            |            |
| pck-Pro-2                         | ATGGATAACG TTGAACTTTC                                            |            |
| pck-P-1                           | GTTGGTTATC CAGAATCAAA                                            |            |
| pck-P-2                           | TTCCTGCTC CTTAGCCAAT                                             |            |
| <b><i>ptsI</i> deletion</b>       |                                                                  |            |
| ptsI-D-up                         | CGCATTATGTTCCCGATGAT                                             | This study |
| ptsI-D-down                       | GCCTTTCAGTTCAACGGTGT                                             |            |
| ptsI-D-1                          | CGGCCCAATTTACTGCTTAG                                             |            |
| ptsI-D-2                          | ATCCCCAGCAACAGAAGTGT                                             |            |
| <b><i>gldA</i> deletion</b>       |                                                                  |            |
| gldA-up                           | TGTATATAGCGCCGCACAAG                                             | This study |
| gldA-down                         | GATGGCAAGGTTGGTATTGG                                             |            |
| gldA-1                            | ACCAGTACGGTCAGCGTTTC                                             |            |
| gldA-2                            | ACCCGGTGATTGAATAATGC                                             |            |

---

|                              |                                                                         |            |
|------------------------------|-------------------------------------------------------------------------|------------|
| <b><i>glpA</i> deletion</b>  |                                                                         |            |
| glpA-D-up                    | ATGAAAACCTCGCGACTCGCAATCAAGTGACGT<br>GATTATCATTGGC GTGTAGGCTGGAGCTGCTTC | This study |
| glpA-D-down                  | TCAAAGCGCATCTTTCTGCTCCTTCTCCAGACCA<br>CACAATCCCTG CATATGAATATCCTCCTTAG  |            |
| <b><i>dhaKL</i> deletion</b> |                                                                         |            |
| dhaKL-D-up                   | ATGAAAAAATTGATCAATGATGTGCAAGACGTA<br>GGACGAACAA GTGTAGGCTGGAGCTGCTTC    | This study |
| dhaKL-D-down                 | TTACTCTTTTTCGGGCTAACGCCAACATTTGCATCAT<br>AAACATCAC CATATGAATATCCTCCTTAG |            |
| <b><i>dhaM</i> deletion</b>  |                                                                         |            |
| dhaM-D-up                    | GTGATGGTAAACCTGGTCATAGTTTCACATAGCA<br>GCCGACTGGGA GTGTAGGCTGGAGCTGCTTC  | This study |
| dhaM-D-down                  | TTAACCTGACGGTTGAAACGTTGCGTTTTAACG<br>TCCAGCGTTAG CATATGAATATCCTCCTTAG   |            |
| <b><i>ptsA</i> deletion</b>  |                                                                         |            |
| ptsA-D-up                    | ATGGCCCTGATTGTGGAATTTATTTGTGAGCTACC<br>TAA CGGCGTA GTGTAGGCTGGAGCTGCTTC | This study |
| ptsA-D-down                  | TTACAGTTCAGTTCATGTTGCAGCAGGCTGGCGA<br>TAG CGTCGGC CATATGAATATCCTCCTTAG  |            |
| <b><i>ptsH</i> deletion</b>  |                                                                         |            |
| ptsH-D-up                    | ATGTTCCAGCAAGAAGTTACCATTACCGCTCCG<br>AACGGTCTGCAC GTGTAGGCTGGAGCTGCTTC  | This study |
| ptsH-D-down                  | TTACTCGAGTTCCGCCATCAGTTTAACCAGATG<br>TTCAACCGCTTT CATATGAATATCCTCCTTAG  |            |

---
